# Supplementary material for: Ferulic Acid Alleviates Lipotoxicity-induced Hepatocellular Death Through SIRT1 Activating-regulated Autophagy Pathway, and Independently of AMPK and Akt in AML-12 Hepatocytes
Source: Research Square preprint supplement (doi:10.21203/rs.3.rs-97741/v1), 2020-10-30
Supplement: Supplementary file 1 [file dd4b62eb2047522d4e4de85e.docx]

Supplementary Data


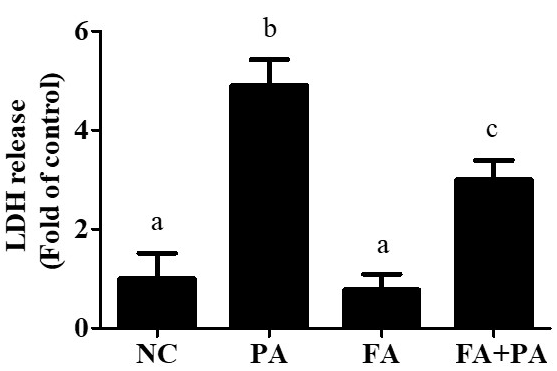


Figure S1 Ferulic acid alleviates palmitate-induced cell death in HepG2 cells. The human hepatoma cell line (HepG2) was obtained from Shanghai Institute of Cell Bank (Shanghai, China). Cells were cultured in Dulbecco’s Modified Eagle Medium (DMEM, Thermo Scientific Inc, VA) containing 10% (v/v) fetal bovine serum (FBS, Biological Industries, Israel), 100 U /mL penicillin and streptomycin (Thermo Scientific Inc, VA) at 37°C in a humidified O2/CO2 (19:1) atmosphere. Cells were incubated with 0.5 mM palmitic acid (PA) for 12 h at 80% confluence, with 100 μM FA pretreatment for 2 h before PA exposure. LDH release was detected. All values are denoted as means ± SD from three or more independent batches of cells. Bars with different superscripts are significantly different at *p* ˂ 0.05.


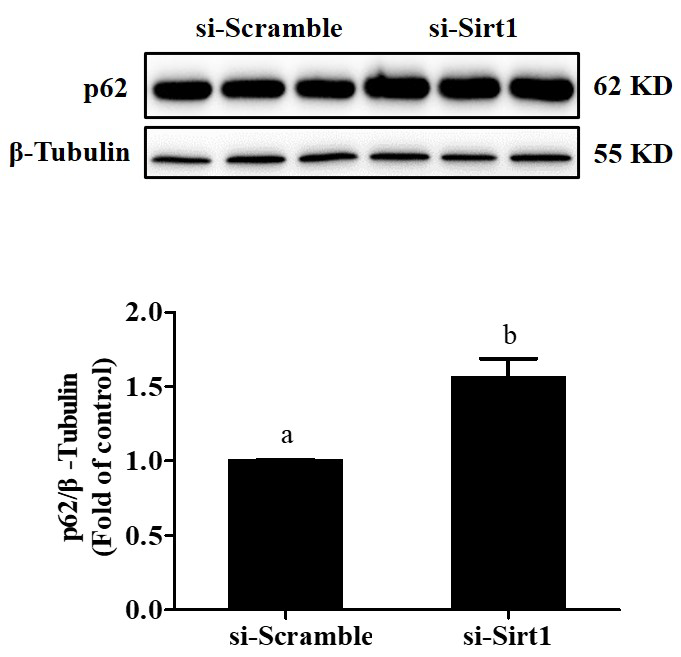


Figure S2 SIRT1-knockdown increases p62 expression in hepatocytes. AML-12 cells were transfected with si-SIRT1 or scramble siRNA. p62 protein expression was detected by immunoblotting. All values are denoted as means ± SD from three or more independent batches of cells. Bars with different superscripts are significantly different at *p* ˂ 0.05.
